# Supplementary material for: The role of agostic interaction in the mechanism of ethylene polymerisation using Cr(iii) half-sandwich complexes: What dictates the reactivity?
Source: Royal Society of Chemistry journal article supplement (doi:10.1039/d3dt02032k), 2023-01-01
Supplement: d3dt02032k2.pdf [file d3dt02032k2.pdf]

Supporting Information

**The Role of Agostic Interaction in the Mechanism of Ethylene  
Polymerisation by Cr(III) Half-sandwich Complexes: What Dictates the  
Reactivity?**

Thakur Rochak Kumar Rana, Abinash Swain, and Gopalan Rajaraman\*.

Department of Chemistry, Indian Institute of Technology, Bombay. Mumbai – 400076, India. Email:  
rajaraman@chem.iitb.ac.in

**Table S1:** Compression of the structural parameter optimized Geometry with Experiments

| Pre-catalyst 1                        | Experimental Data | Computational Data |
|---------------------------------------|-------------------|--------------------|
| Cr-N <sub>py</sub>                    | 2.107             | 2.134              |
| Cr-Cp <sup>c</sup>                    | 1.890             | 1.963              |
| Cr-Cl                                 | 2.287             | 2.266              |
| Cr-Cl                                 | 2.281             | 2.261              |
| ∠N <sub>py</sub> -Cr- Cp <sup>c</sup> | 109.3             | 108.9              |
| ∠ Cp <sup>c</sup> -Cr-Cl              | 125.5             | 125.2              |
| ∠ Cp <sup>c</sup> -Cr-Cl              | 124.7             | 123.0              |
| ∠Cl-Cr-Cl                             | 97.4              | 100.4              |
| Pre-catalyst 2                        | Experimental Data | Computational Data |
| Cr-N <sub>py</sub>                    | 2.077             | 2.108              |
| C-N <sub>pyr</sub>                    | 1.348             | 1.353              |
| Cr-Cp <sup>c</sup>                    | 1.888             | 1.969              |
| Cr-Cl                                 | 2.293             | 2.272              |
| Cr-Cl                                 | 2.288             | 2.267              |
| ∠N <sub>py</sub> -Cr- Cp <sup>c</sup> | 109.9             | 109.0              |
| ∠ Cp <sup>c</sup> -Cr-Cl              | 124.5             | 125.1              |
| ∠ Cp <sup>c</sup> -Cr-Cl              | 123.3             | 123.2              |
| ∠Cl-Cr-Cl                             | 98.8              | 99.4               |

Cp<sup>c</sup>: center of the cyclopentadienyl ring

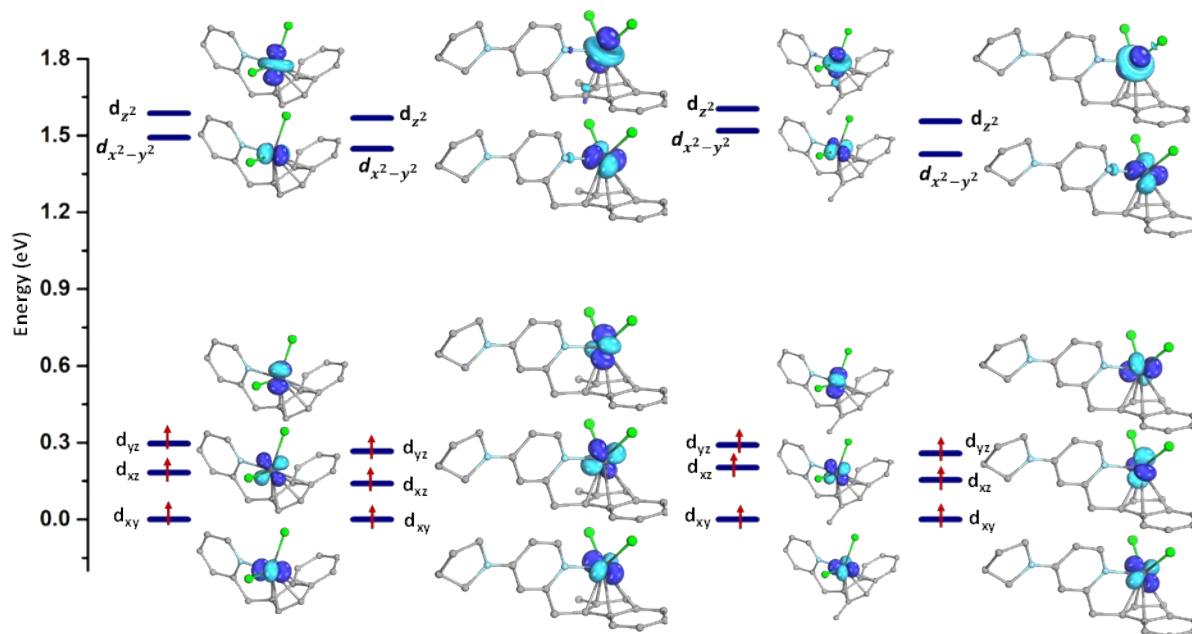**Figure S1.** CASSCF/NEVPT2 computed ab initio ligand field theory (AILFT) metal d-orbitals pre-catalyst 1, pre-catalyst 2, Model 1 and Model2 (energies are in eV).

**Table S2:** DLPNO-CCSD(T) computed relative energies of each spin state of pre-catalysts

| Catalysts | Spin | DLPNO-CCSD(T) Energies (Hartree) | Relative Energies (kJ/mol) |
|-----------|------|----------------------------------|----------------------------|
| Pre-cat1  | 4    | -2603.920589                     | 0                          |
|           | 2    | -2603.849689                     | 186                        |
| Pre-cat2  | 4    | -2854.39178                      | 0                          |
|           | 2    | -2854.319545                     | 189                        |

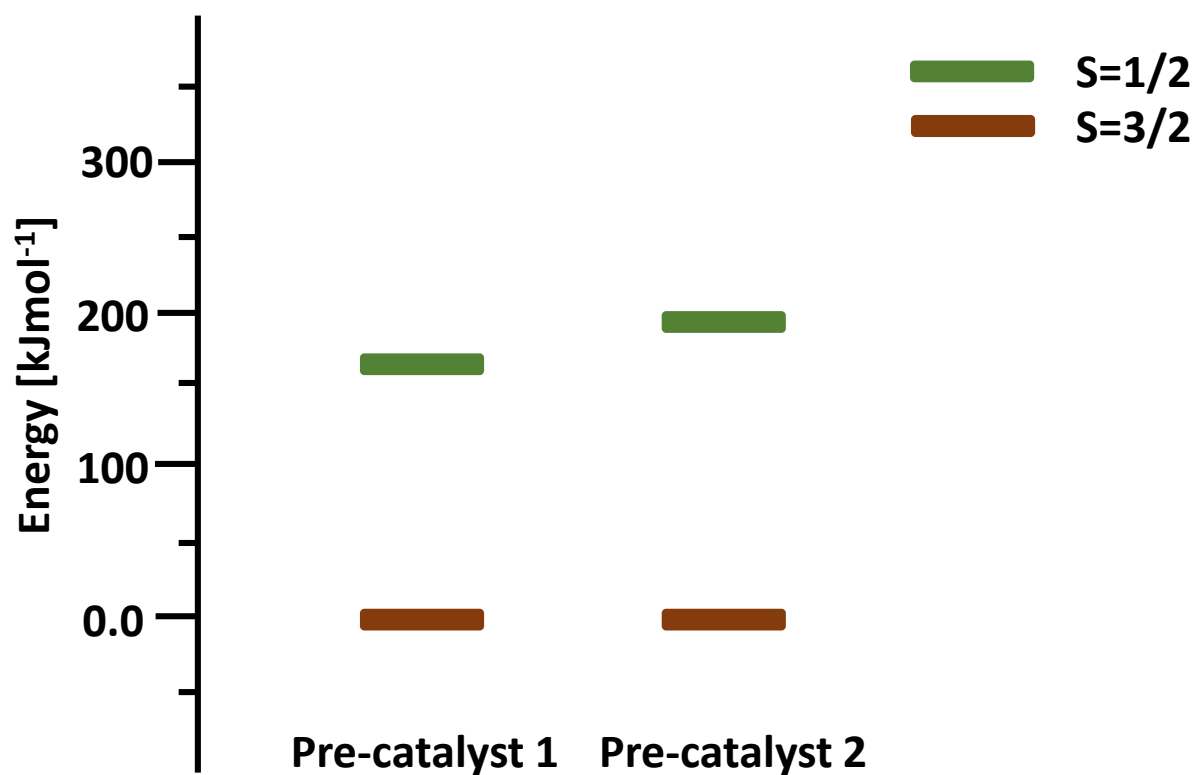

**Figure S2.** DLPNO-CCSD(T) computed energy separation between the ground state and other excited

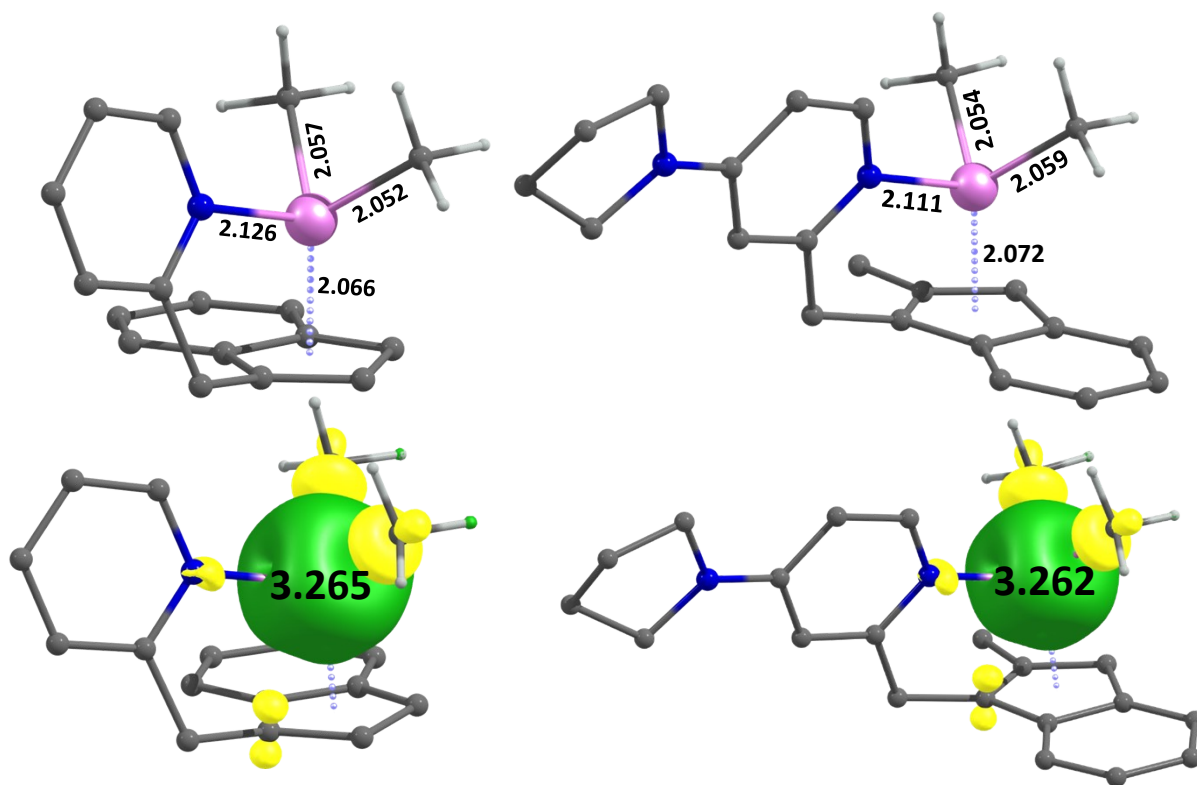

**Figure S3.** Optimized structure and spin density plots of 1-R1 & 2-R1.

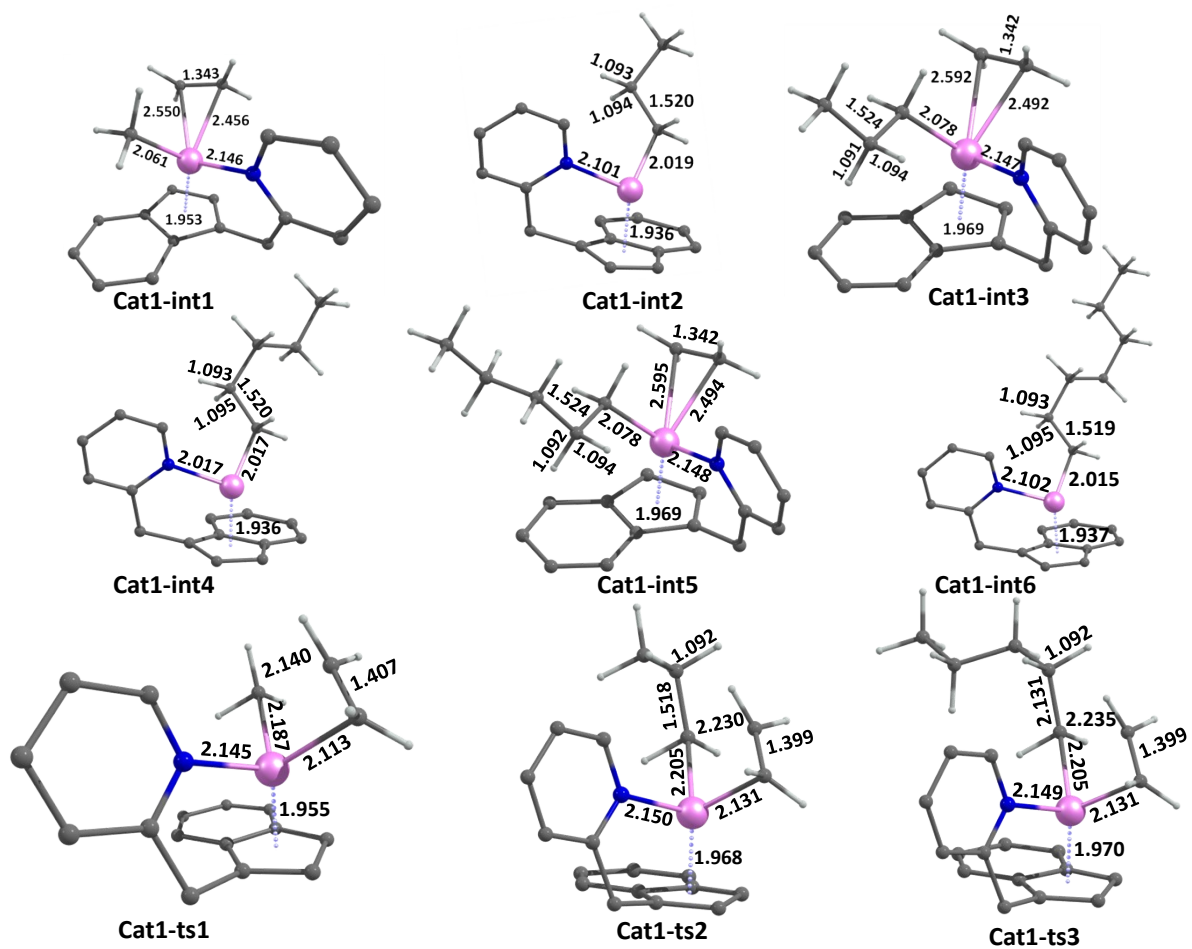

Figure S4. The DFT optimized geometry and structural parameters for 1-INT1 to 1-INT6 and 1-TS1 to 1-TS3.

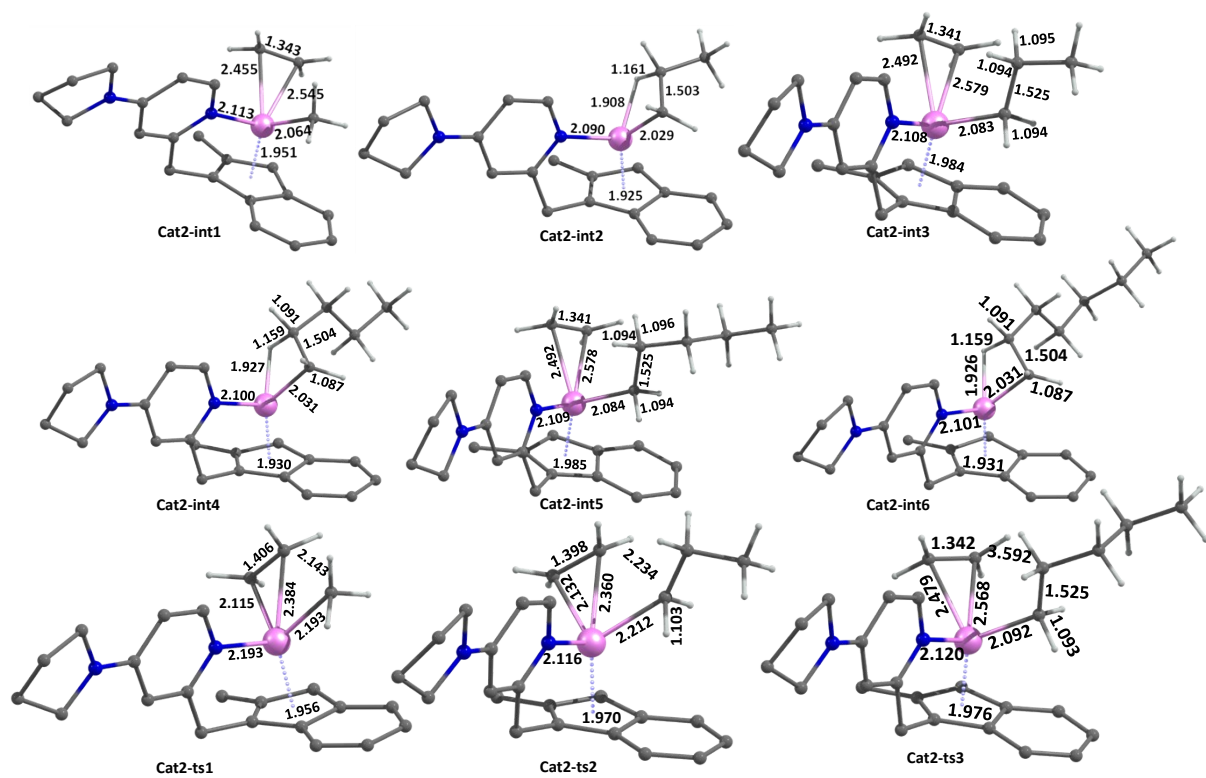

**Figure S5.** The DFT optimized geometry and structural parameters for 2-INT1 to 2-INT6 and 2-TS1 to 2-TS3.

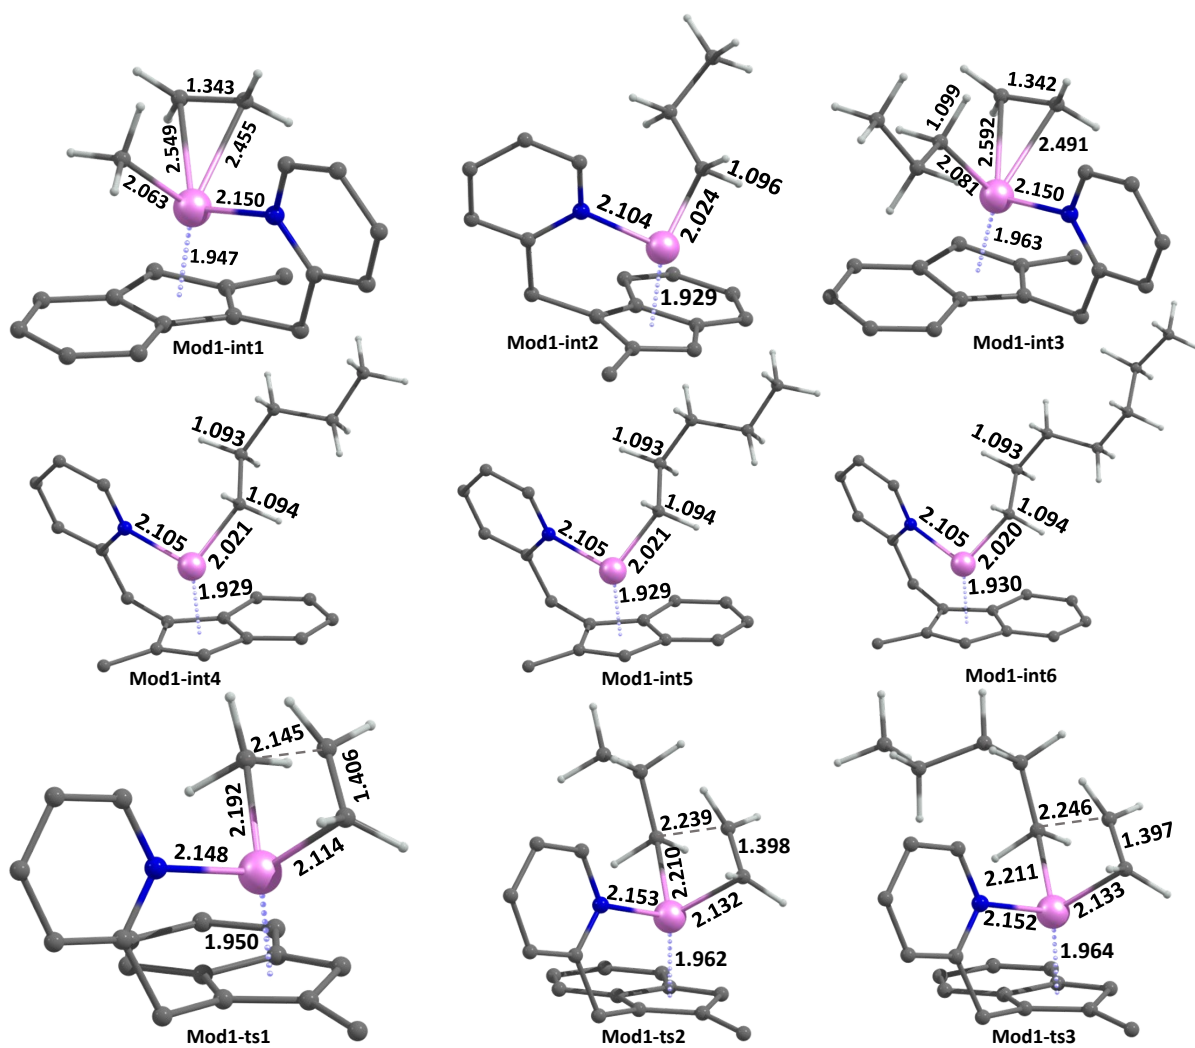

**Figure S6.** The DFT optimized geometry and structural parameters for mod1-INT1 to mod1-INT6 and mod1-TS1 to mod1-TS3.

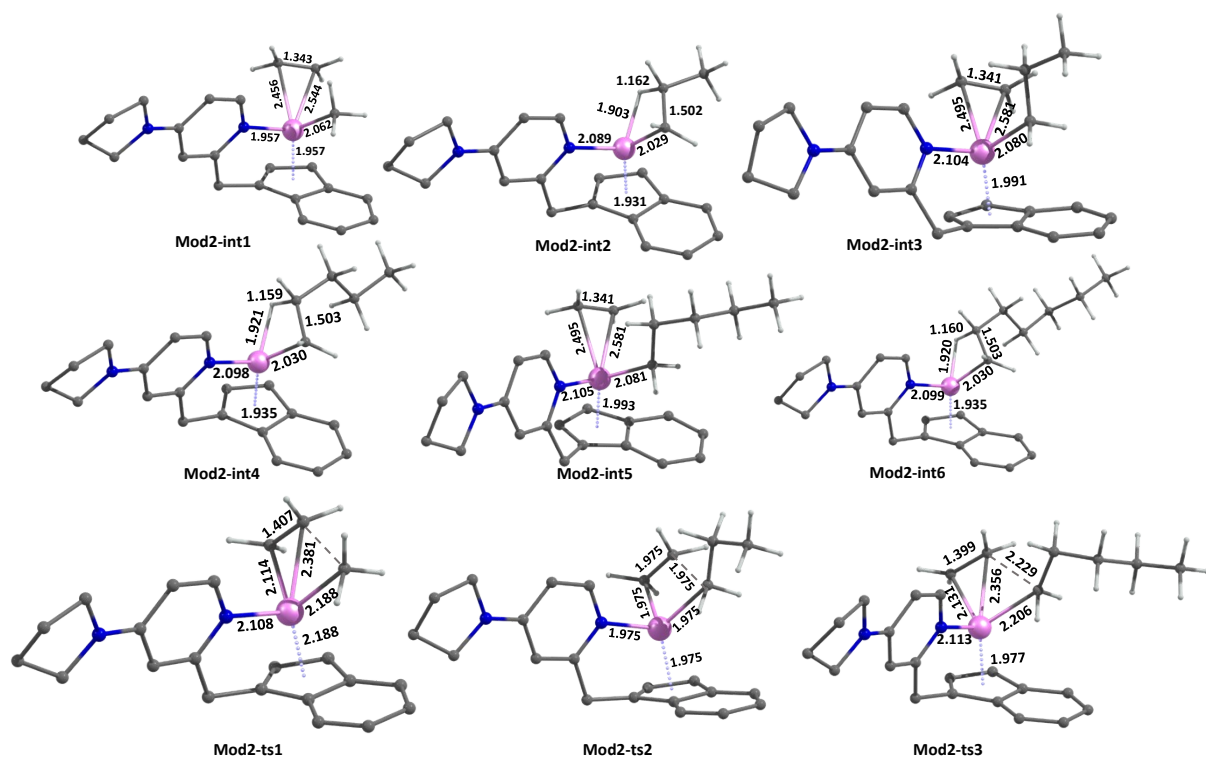

**Figure S7.** The DFT optimized geometry and structural parameters for mod2-INT1 to mod2-INT6 and mod2-TS1 to mod2-TS3.



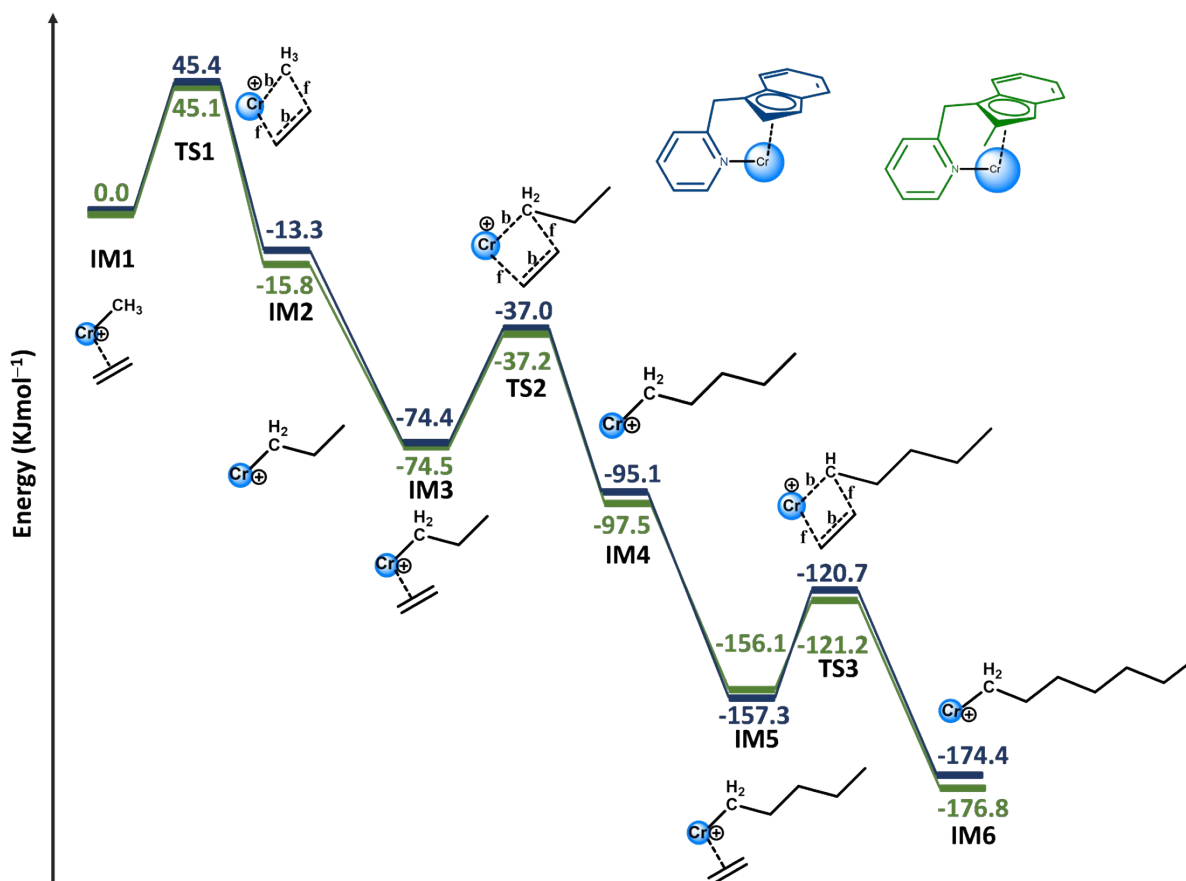

**Figure S8:** DFT-computed potential energy diagram (kJ/mol) of the ethylene polymerisation for catalyst 1 (Blue) and model 1 (Green).

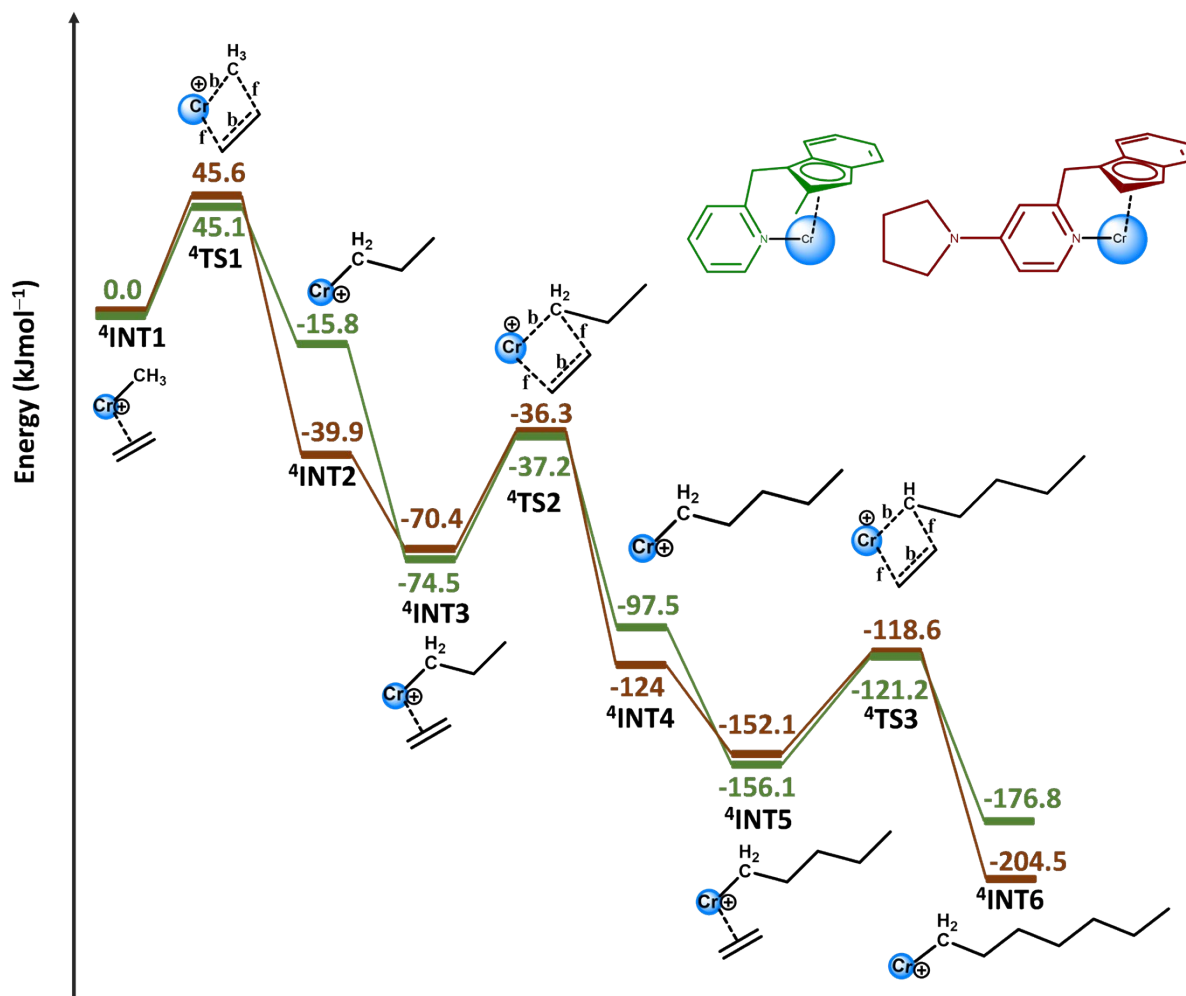

**Figure S9:** DFT-computed potential energy diagram (kJ/mol) of the ethylene polymerisation for model 1 (green) and model 2 (Brown).

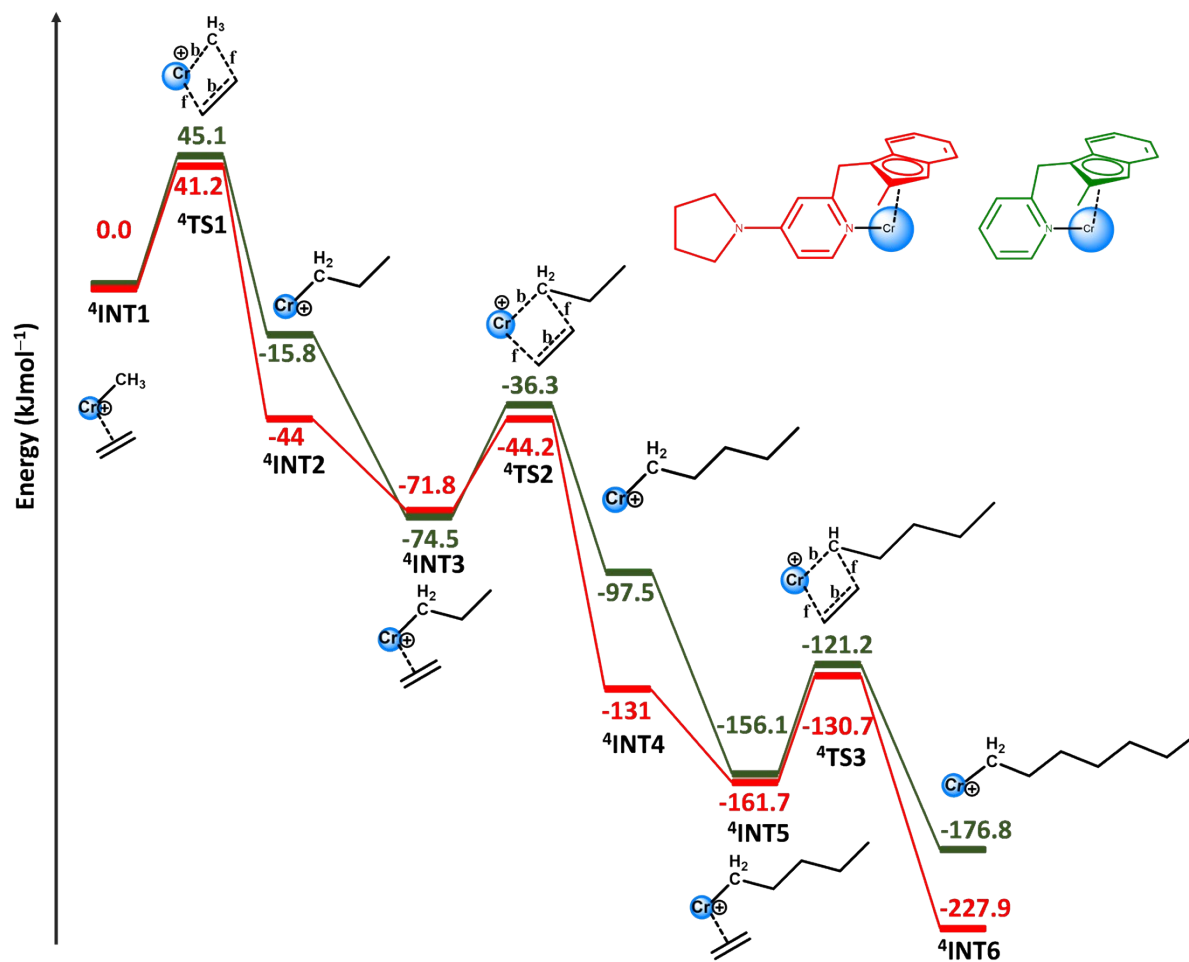

**Figure S10:** DFT-computed potential energy diagram ( $\text{kJ/mol}$ ) of the ethylene polymerisation for catalyst 2 (Blue) and model 1 (Green).

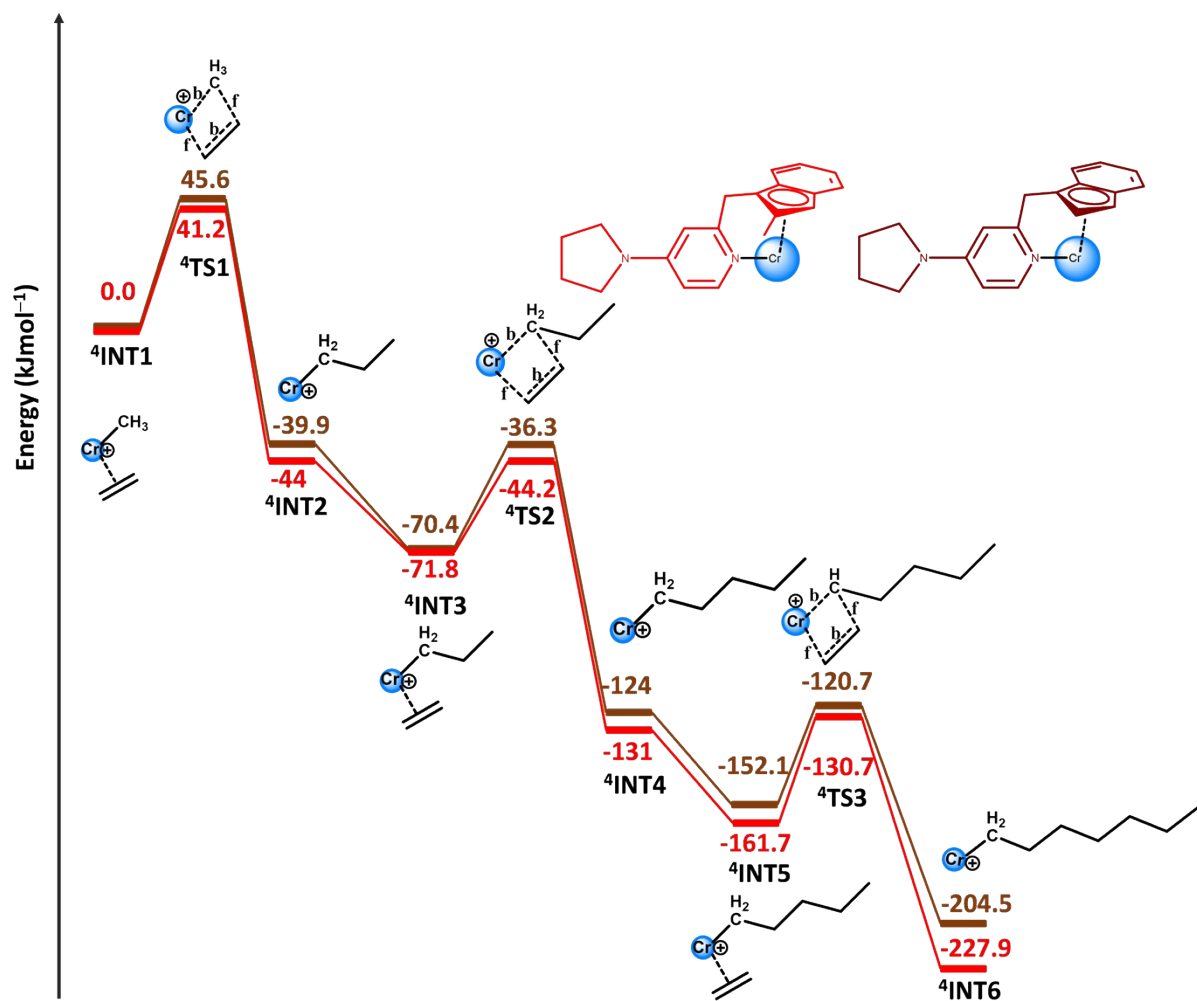

**Figure S11:** DFT-computed potential energy diagram (kJ/mol) of the ethylene polymerisation for catalyst **2** (Red) and model **2** (Brown).

**Table S3.** Calculated relevant bond parameters (bond lengths in Å and bond angles in °).

| Species   | Cr-N <sub>py</sub> | Cr-Cp <sup>c</sup> | Cr-C <sub>Chain</sub> | Cr-C <sub>ethene</sub> | ∠N <sub>py</sub> -Cr-Cp <sup>c</sup> | ∠C <sub>chain</sub> -Cr-Cp <sup>c</sup> | ∠C <sub>chain</sub> -Cr-C <sub>ethene</sub> | ∠N <sub>py</sub> -Cr-C <sub>chain</sub> | ∠N <sub>py</sub> -Cr-C <sub>ethene</sub> |
|-----------|--------------------|--------------------|-----------------------|------------------------|--------------------------------------|-----------------------------------------|---------------------------------------------|-----------------------------------------|------------------------------------------|
| Pre-cat1  | 2.134              | 1.963              | -                     | -                      | 108.9                                | -                                       | -                                           | -                                       | -                                        |
| Pre-cat2  | 2.108              | 1.969              | -                     | -                      | 109.0                                | -                                       | -                                           | -                                       | -                                        |
| R1-cat1   | 2.126              | 2.066              | 2.057                 | 2.052                  | 108.2                                | 124.9                                   | 125.7                                       | 101.7                                   | 97.3                                     |
| R1-cat2   | 2.111              | 2.072              | 2.059                 | 2.054                  | 108.1                                | 124.9                                   | 125.6                                       | 101.8                                   | 97.9                                     |
| INT1-cat1 | 2.146              | 1.953              | 2.061                 | 2.456/2.550            | 109.5                                | 124.5                                   | 97.5                                        | 94.4                                    | 91.3                                     |
| INT2-cat1 | 2.101              | 1.936              | 2.019                 | -                      | 112.9                                | 134.0                                   | -                                           | 100.0                                   | -                                        |
| INT3-cat1 | 2.147              | 1.969              | 2.078                 | 2.492/2.592            | 109.4                                | 128.8                                   | 94.4                                        | 96.4                                    | 94.4                                     |
| INT4-cat1 | 2.102              | 1.936              | 2.017                 | -                      | 112.8                                | 134.2                                   | -                                           | 100.2                                   | -                                        |
| INT5-cat1 | 2.148              | 1.969              | 2.078                 | 2.494/2.595            | 109.4                                | 129.0                                   | 94.4                                        | 96.4                                    | 94.4                                     |
| INT6-cat1 | 2.102              | 1.937              | 2.015                 | -                      | 112.8                                | 134.0                                   | -                                           | 100.5                                   | -                                        |
| INT1-cat2 | 2.113              | 1.951              | 2.064                 | 2.455/2.545            | 109.8                                | 124.9                                   | 97.0                                        | 95.2                                    | 90.4                                     |
| INT2-cat2 | 2.090              | 1.925              | 2.029                 | -                      | 112.7                                | 133.4                                   | -                                           | 98.9                                    | -                                        |
| INT3-cat2 | 2.108              | 1.984              | 2.083                 | 2.492/2.579            | 110.2                                | 122.6                                   | 98.9                                        | 93.4                                    | 97.6                                     |
| INT4-cat2 | 2.100              | 1.930              | 2.031                 | -                      | 112.4                                | 133.6                                   | -                                           | 99.0                                    | -                                        |
| INT5-cat2 | 2.109              | 1.985              | 2.084                 | 2.492/2.578            | 110.1                                | 122.6                                   | 98.9                                        | 93.6                                    | 98.9                                     |
| INT6-cat2 | 2.101              | 1.931              | 2.031                 | -                      | 112.4                                | 133.7                                   | -                                           | 98.9                                    | -                                        |
| INT1-mod1 | 2.150              | 1.947              | 2.063                 | 2.455/2.549            | 109.4                                | 125.1                                   | 97.1                                        | 94.5                                    | 91.2                                     |
| INT2-mod1 | 2.104              | 1.929              | 2.024                 | -                      | 112.7                                | 135.0                                   | -                                           | 99.5                                    | -                                        |
| INT3-mod1 | 2.150              | 1.963              | 2.081                 | 2.491/2.592            | 109.4                                | 129.4                                   | 94.0                                        | 96.3                                    | 89.9                                     |
| INT4-mod1 | 2.105              | 1.929              | 2.021                 | -                      | 112.6                                | 135.1                                   | -                                           | 99.8                                    | -                                        |
| INT5-mod1 | 2.151              | 1.964              | 2.081                 | 2.492/2.595            | 109.4                                | 129.6                                   | 94.0                                        | 96.2                                    | 89.9                                     |
| INT6-mod1 | 2.105              | 1.930              | 2.020                 | -                      | 112.6                                | 134.9                                   | -                                           | 99.9                                    | -                                        |
| INT1-mod2 | 2.109              | 1.957              | 2.062                 | 2.456/2.544            | 109.8                                | 124.2                                   | 97.4                                        | 95.2                                    | 90.5                                     |
| INT2-mod2 | 2.089              | 1.931              | 2.0293                | -                      | 112.9                                | 132.2                                   | -                                           | 99.3                                    | -                                        |
| INT3-mod2 | 2.104              | 1.991              | 2.080                 | 2.495/2.581            | 110.3                                | 122.0                                   | 99.2                                        | 93.7                                    | 97.6                                     |
| INT4-mod2 | 2.098              | 1.935              | 2.030                 | -                      | 112.5                                | 132.6                                   | -                                           | 99.4                                    | -                                        |
| INT5-mod2 | 2.105              | 1.993              | 2.081                 | 2.495/2.581            | 110.2                                | 122.0                                   | 99.2                                        | 93.9                                    | 97.7                                     |
| INT6-mod2 | 2.099              | 1.935              | 2.030                 | -                      | 112.4                                | 132.5                                   | -                                           | 99.4                                    | -                                        |

**Cp<sup>c</sup>:** center of the cyclopentadienyl ring

**Table S4.** The DFT computed Mulliken spin densities on selected atoms.

| Spin Density ( $\rho$ ) |       |                 |                    |                     |                  |             |       |
|-------------------------|-------|-----------------|--------------------|---------------------|------------------|-------------|-------|
| Species                 | Cr    | N <sub>py</sub> | C <sub>chain</sub> | C <sub>ethene</sub> | N <sub>pyr</sub> | Cl          | Cl'   |
| Pre-cat1                | 3.106 | -0.036          | -                  | -                   | -                | 0.028/0.035 | 0.035 |
| Pre-cat2                | 3.112 | -0.040          | -                  | -                   | 0.006            | 0.031/0.022 | 0.022 |
| R1-cat1                 | 3.265 | -0.038          | -0.106             | -0.122              | -                | -           | -     |
| R1-cat2                 | 3.262 | -0.037          | -0.120             | -0.106              | -0.036           | -           | -     |
| INT1-cat1               | 3.412 | -0.063          | -0.220             | -0.022/0.023        | -                | -           | -     |
| TS1-cat1                | 3.371 | -0.052          | -0.091             | -0.168/0.016        | -                | -           | -     |
| INT2-cat1               | 3.523 | -0.058          | -0.259             | -                   | -                | -           | -     |
| INT3-cat1               | 3.463 | -0.065          | -0.261             | -0.025/0.023        | -                | -           | -     |
| TS2-cat1                | 3.389 | -0.052          | -0.110             | -0.170/0.018        | -                | -           | -     |
| INT4-cat1               | 3.528 | -0.058          | -0.271             | -                   | -                | -           | -     |
| INT5-cat1               | 3.469 | -0.064          | -0.271             | -0.025/0.024        | -                | -           | -     |
| TS3-cat1                | 3.390 | -0.052          | -0.112             | -0.172/0.018        | -                | -           | -     |
| INT6-cat1               | 3.528 | -0.058          | -0.275             | -                   | -                | -           | -     |
| INT1-cat2               | 3.384 | -0.066          | -0.215             | -0.016/0.021        | 0.012            | -           | -     |
| TS1-cat2                | 3.356 | -0.055          | -0.090             | -0.162/0.016        | 0.011            | -           | -     |
| INT2-cat2               | 3.420 | -0.059          | -0.240             | -                   | 0.012            | -           | -     |
| INT3-cat2               | 3.457 | -0.075          | -0.260             | -0.012/0.027        | 0.011            | -           | -     |
| TS2-cat2                | 3.376 | -0.057          | -0.111             | -0.164/0.018        | 0.010            | -           | -     |
| INT4-cat2               | 3.434 | -0.061          | -0.247             | -                   | 0.012            | -           | -     |
| INT5-cat2               | 3.463 | -0.075          | -0.269             | -0.013/0.027        | 0.011            | -           | -     |
| TS3-cat2                | 3.449 | -0.068          | -0.268             | -0.024/0.035        | 0.011            | -           | -     |
| INT6-cat2               | 3.435 | -0.062          | -0.247             | -                   | 0.012            | -           | -     |
| INT1-mod1               | 3.412 | -0.064          | -0.218             | -0.020/0.023        | -                | -           | -     |
| TS1-mod1                | 3.378 | -0.053          | -0.092             | -0.0163/0.017       | -                | -           | -     |
| INT2- mod1              | 3.522 | -0.056          | -0.252             | -                   | -                | -           | -     |
| INT3- mod1              | 3.462 | -0.066          | -0.256             | -0.023/0.023        | -                | -           | -     |
| TS2-mod1                | 3.397 | -0.054          | -0.113             | -0.165/0.018        | -                | -           | -     |
| INT4- mod1              | 3.527 | -0.056          | -0.263             | -                   | -                | -           | -     |
| INT5- mod1              | 3.468 | -0.066          | -0.266             | -0.023/0.024        | -                | -           | -     |
| TS3-mod1                | 3.398 | -0.054          | -0.114             | -0.166/0.019        | -                | -           | -     |
| INT6- mod1              | 3.527 | -0.056          | -0.267             | -                   | -                | -           | -     |
| INT1-mod2               | 3.382 | -0.064          | 0.217              | -0.018/0.021        | 0.013            | -           | -     |
| TS1-mod2                | 3.348 | -0.053          | -0.089             | -0.166/0.016        | 0.011            | -           | -     |
| INT2- mod2              | 3.421 | -0.059          | -0.245             | -                   | 0.012            | -           | -     |
| INT3- mod2              | 3.457 | -0.077          | -0.261             | -0.013/0.025        | 0.011            | -           | -     |
| TS2-mod2                | 3.368 | -0.054          | -0.108             | -0.169/0.018        | 0.011            | -           | -     |
| INT4- mod2              | 3.433 | -0.060          | -0.251             | -                   | 0.012            | -           | -     |
| INT5- mod2              | 3.463 | -0.077          | 0.270              | -0.013/0.026        | 0.011            | -           | -     |
| TS3-mod2                | 3.370 | -0.054          | -0.115             | -0.170/0.019        | 0.011            | --          | -     |
| INT6- mod2              | 3.434 | -0.060          | -0.252             | -                   | 0.012            | -           | -     |

**Table S5.** The DFT computed NBO charges on pertinent atoms.

| Species   | Cr    | N <sub>py</sub> | C <sub>Chain</sub> | C <sub>ethene</sub> | N <sub>pyr</sub> | Cl     | Cl'    |
|-----------|-------|-----------------|--------------------|---------------------|------------------|--------|--------|
| Pre-cat1  | 0.150 | -0.375          | -                  | -                   | -                | -0.259 | -0.282 |
| Pre-cat2  | 0.256 | -0.199          | -                  | -                   | -0.039           | -0.378 | -0.396 |
| R1-cat1   | 0.426 | -0.315          | -0.745             | -0.272/-0.197       | -                | -      | -      |
| R1-cat2   | 0.379 | -0.357          | -0.730             | -0.202/-0.262       | -0.228           | -      | -      |
| INT1-cat1 | 0.312 | -0.412          | -0.831             | -0.367/-0.296       | -                | -      | -      |
| TS1-cat1  | 0.316 | -0.178          | -0.533             | -0.138/-0.336       | -                | -      | -      |
| INT2-cat1 | 0.720 | -0.445          | -0.592             | --                  | -                | -      | -      |
| INT3-cat1 | 0.579 | -0.423          | -0.598             | -0.372/-0.303       | -                | -      | -      |
| TS2-cat1  | 0.266 | -0.170          | -0.341             | -0.300/-0.146       | -                | -      | -      |
| INT4-cat1 | 0.717 | -0.444          | -0.590             | --                  | -                | -      | -      |
| INT5-cat1 | 0.322 | -0.143          | -0.466             | -0.208/-0.182       | -                | -      | -      |
| TS3-cat1  | 0.260 | -0.171          | -0.392             | -0.296/-0.147       | -                | -      | -      |
| INT6-cat1 | 0.713 | -0.444          | -0.586             | --                  | -                | -      | -      |
| INT1-cat2 | 0.312 | -0.179          | -0.632             | -0.174/-0.203       | -0.024           | -      | -      |
| TS1-cat2  | 0.294 | -0.210          | -0.535             | -0.339/-0.129       | -0.024           | -      | -      |
| INT2-cat2 | 0.437 | -0.462          | -0.508             | --                  | -0.329           | -      | -      |
| INT3-cat2 | 0.644 | -0.470          | -0.609             | -0.308/-0.384       | -0.330           | -      | -      |
| TS2-cat2  | 0.240 | -0.199          | -0.336             | -0.305/-0.135       | 0.024            | -      | -      |
| INT4-cat2 | 0.473 | -0.467          | -0.522             | --                  | -0.330           | -      | -      |
| INT5-cat2 | 0.654 | -0.471          | -0.613             | -0.308/-0.385       | -0.330           | -      | -      |
| TS3-cat2  | 0.300 | -0.189          | -0.430             | -0.217/-0.194       | -0.024           | -      | -      |
| INT6-cat2 | 0.475 | -0.467          | -0.522             | --                  | -0.330           | -      | -      |
| INT1-mod1 | 0.526 | -0.415          | -0.845             | -0.372/-0.297       | -                | -      | -      |
| TS1-mod1  | 0.274 | -0.166          | -0.354             | -0.340/-0.130       | -                | -      | -      |
| INT2-mod1 | 0.739 | -0.448          | -0.605             | --                  | -                | -      | -      |
| INT3-mod1 | 0.635 | -0.437          | -0.616             | -0.305/-0.377       | -                | -      | -      |
| TS2-mod1  | 0.222 | -0.157          | -0.340             | -0.306/-0.135       | -                | -      | -      |
| INT4-mod1 | 0.737 | -0.448          | -0.603             | --                  | -                | -      | -      |
| INT5-mod1 | 0.644 | -0.428          | -0.621             | -0.378/-0.305       | -                | -      | -      |
| TS3-mod1  | 0.218 | -0.156          | -0.395             | -0.303/-0.135       | -                | -      | -      |
| INT6-mod1 | 0.735 | -0.447          | -0.600             | --                  | -                | -      | -      |
| INT1-mod2 | 0.479 | -0.457          | -0.830             | -0.302/-0.362       | -0.328           | -      | -      |
| TS1-mod2  | 0.337 | -0.223          | -0.534             | -0.335/-0.138       | -0.023           | -      | -      |
| INT2-mod2 | 0.417 | -0.460          | -0.501             | --                  | -0.329           | -      | -      |
| INT3-mod2 | 0.590 | -0.462          | -0.591             | -0.379/-0.307       | -0.329           | -      | -      |
| TS2-mod2  | 0.285 | -0.214          | -0.338             | -0.299/-0.145       | -0.024           | -      | -      |
| INT4-mod2 | 0.447 | 0.465           | -0.514             | --                  | -0.329           | -      | -      |
| INT5-mod2 | 0.598 | -0.463          | -0.595             | -0.380/-0.307       | -0.329           | -      | -      |
| TS3-mod2  | 0.280 | -0.214          | -0.377             | -0.294/-0.145       | -0.024           | -      | -      |
| INT6-mod2 | 0.448 | -0.465          | -0.513             | --                  | -0.329           | -      | -      |

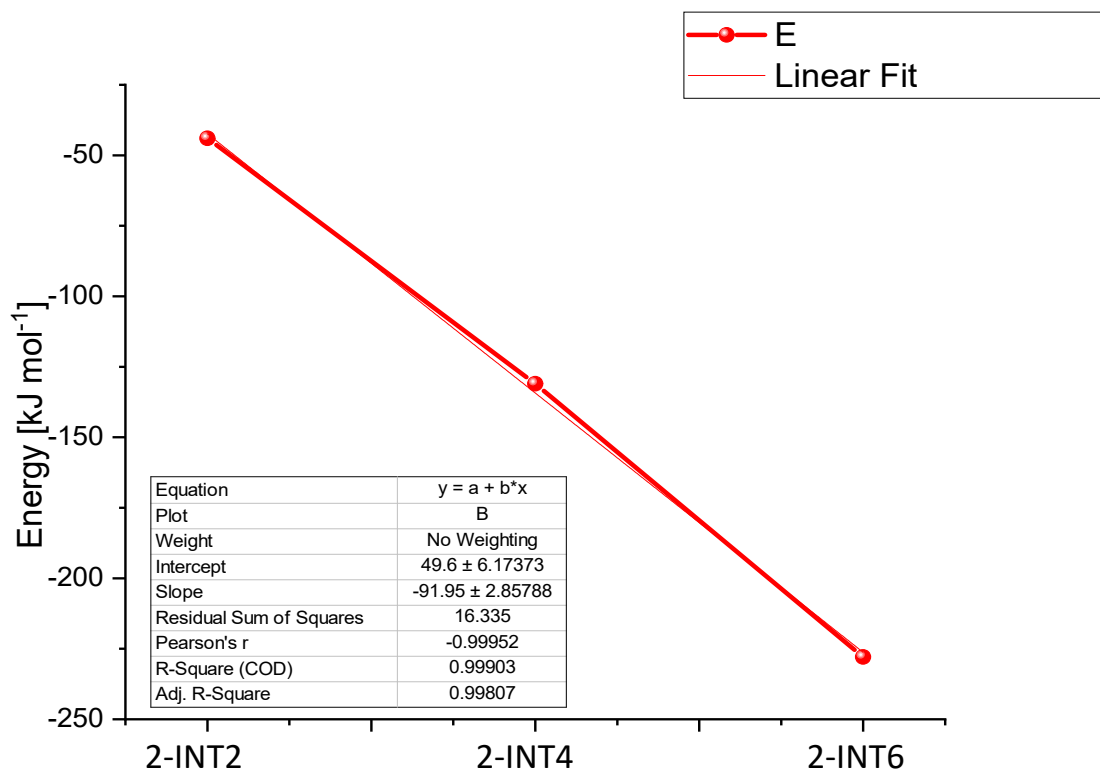

**Figure S12.** The linear variation of Energy vs 2-INT2 – 2-INT6 with continuous decrease for every successive alkyl migrated species for catalyst 2.



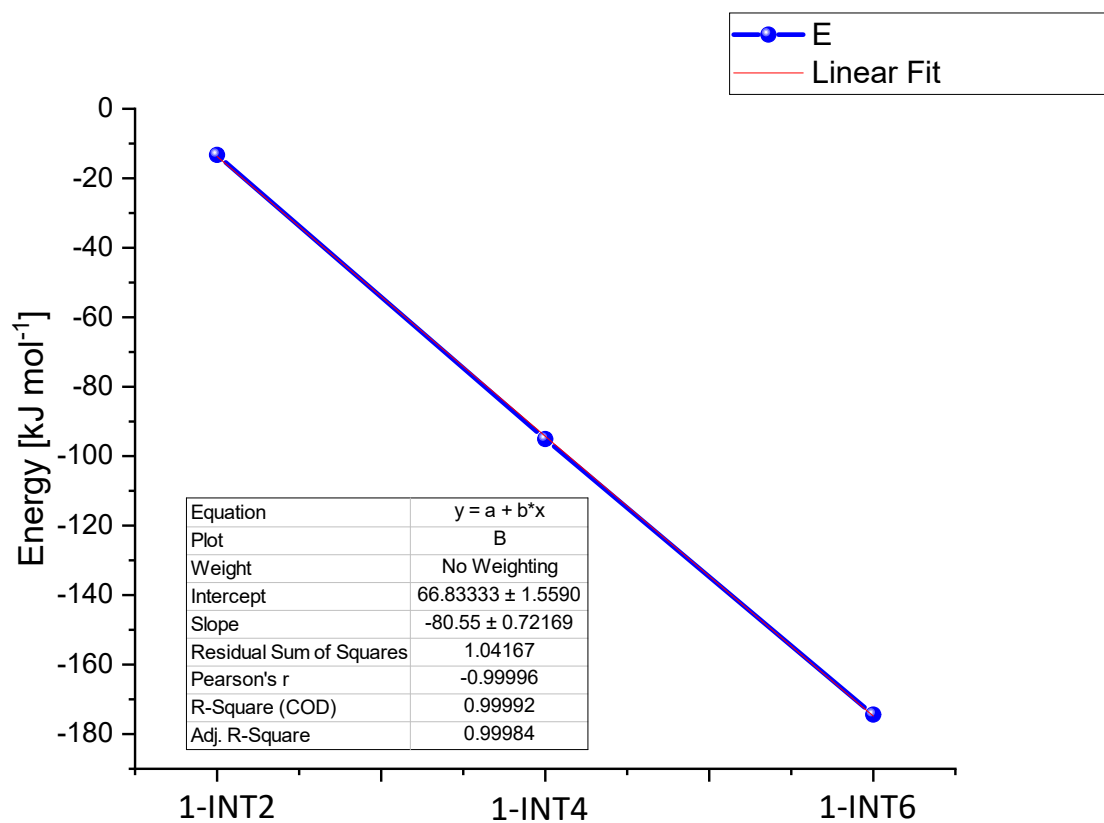

**Figure S13.** The linear variation of Energy vs 1-INT2 – 1-INT6 with continuous decrease for every successive alkyl migrated species for complex 1.

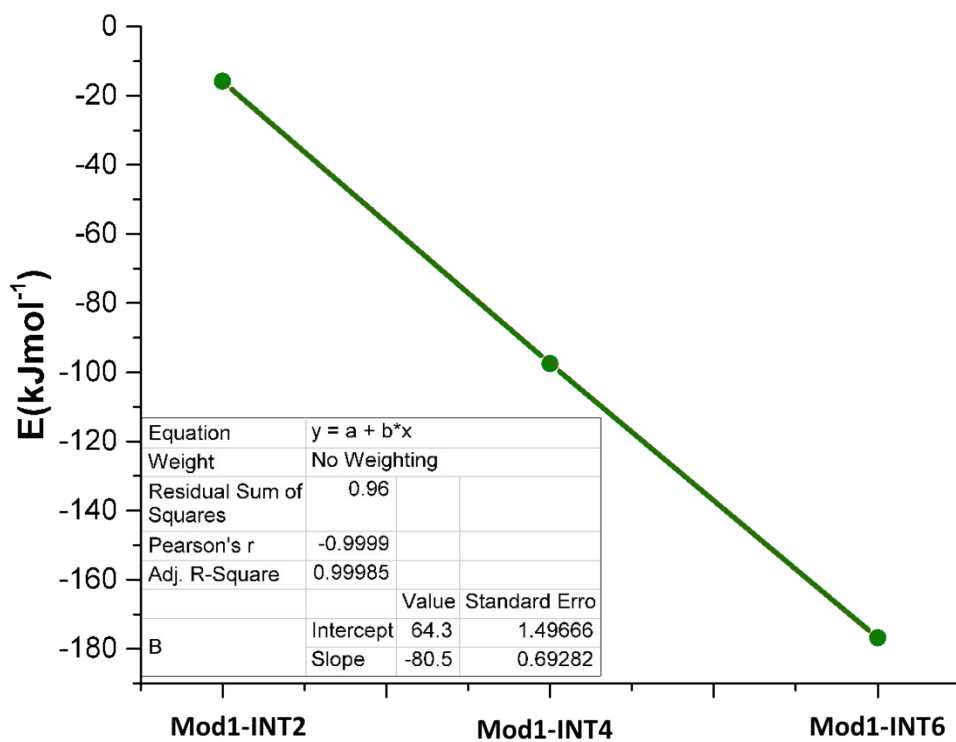

**Figure S14.** The linear variation of Energy vs 1-INT2 – 1-INT6 with continuous decrease for every successive alkyl migrated species for model 1.

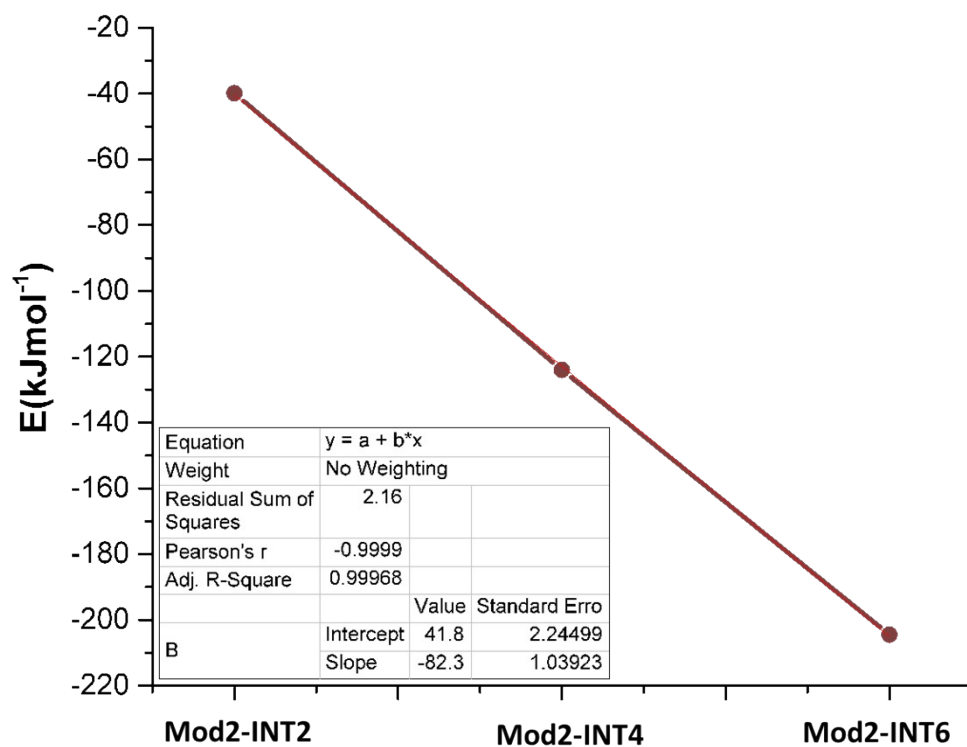

**Figure S15.** The linear variation of Energy vs 1-INT2 – 1-INT6 with continuous decrease for every successive alkyl migrated species for model 2.

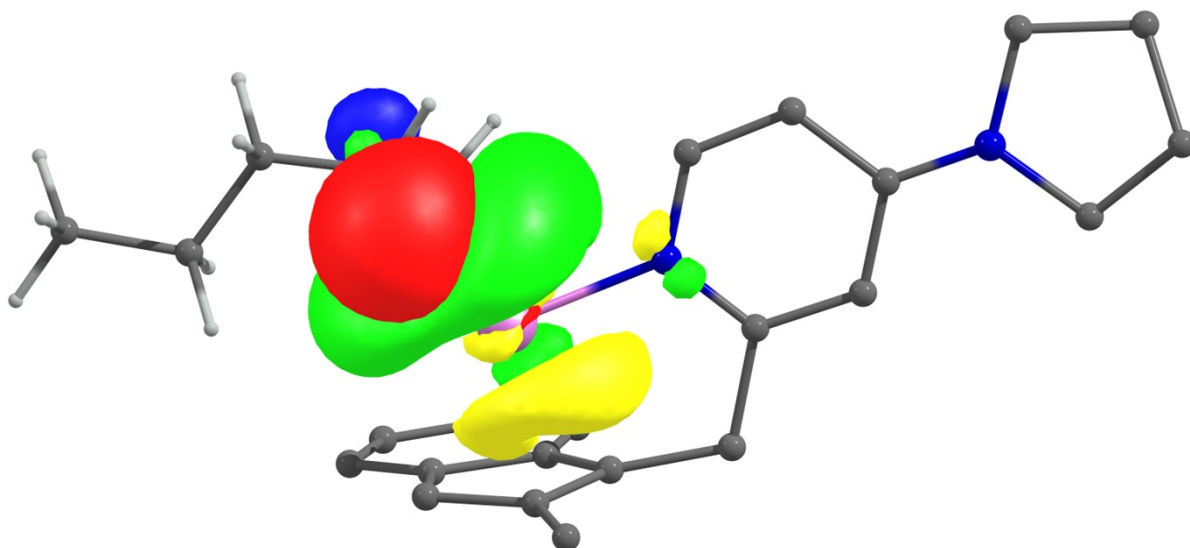

**Figure S16.** NBO plot of 2-IN4 showing the orbital interaction diagram between the  $\sigma(\text{C-H}) \rightarrow \text{Cr}$  ( $d_z^2$ )
